1 **The cell wall lipoprotein CD1687 acts as a DNA binding protein during**  
2 **deoxycholate-induced biofilm formation in *Clostridioides difficile***

3

4 Emile Auria<sup>a</sup>, Lise Hunault<sup>b,c</sup>, Patrick England<sup>d</sup>, Marc Monot<sup>e</sup>, Juliana Pipoli Da Fonseca<sup>e</sup>,  
5 Mariette Matondo<sup>f</sup>, Magalie Duchateau<sup>f</sup>, Yannick D.N. Tremblay<sup>g</sup> and Bruno Dupuy<sup>a#</sup>  
6

7 <sup>a</sup> Institut Pasteur, Université Paris-Cité, UMR-CNRS 6047, Laboratoire Pathogenèse des  
8 Bactéries Anaérobies, F-75015 Paris, France

9 <sup>b</sup> Sorbonne Université, INSERM, CNRS, Centre d'Immunologie et des Maladies Infectieuses  
10 (CIMI-Paris), F-75013 Paris, France

11 <sup>c</sup> Institut Pasteur, Université Paris-Cité, INSERM UMR1222, Unit of Antibodies in Therapy  
12 and Pathology, Paris, France

13 <sup>d</sup> Plateforme de Biophysique Moléculaire, Institut Pasteur, CNRS UMR3528, Paris, France.

14 <sup>e</sup> Plateforme technologique Biomics, Institut Pasteur, Paris, France

15 <sup>f</sup> Plateforme Proteomic, Institut Pasteur, France

16 <sup>g</sup> Department of Biochemistry, Microbiology and Immunology, University of Saskatchewan:  
17 Saskatoon, SK, CA

18

19

20

21

22 # To whom correspondence should be addressed: BD: Institut Pasteur, Université de Paris  
23 cité, UMR-CNRS 6047, Laboratoire Pathogenèse des Bactéries Anaérobies, F-75015 Paris,  
24 France

25 Tel: 33140613175,

26 Email: [bruno.dupuy@pasteur.fr](mailto:bruno.dupuy@pasteur.fr)

27 **Abstract**

28 The ability of bacterial pathogens to establish recurrent and persistent infections is  
29 frequently associated with their ability to form biofilms. *Clostridioides difficile* infections  
30 have a high rate of recurrence and relapses and it is hypothesised that biofilms are  
31 involved in its pathogenicity and persistence. Biofilm formation by *C. difficile* is still  
32 poorly understood. It has been shown that specific molecules such as deoxycholate  
33 (DCA) or metronidazole induce biofilm formation, but the mechanisms involved remain  
34 elusive. In this study, we describe the role of the *C. difficile* lipoprotein CD1687 during  
35 DCA-induced biofilm formation. We showed that the expression of *CD1687*, which is  
36 part of an operon within the *CD1685-CD1689* gene cluster, is controlled by multiple  
37 transcription starting sites and some are induced in response to DCA. Only CD1687 is  
38 required for biofilm formation and the overexpression of CD1687 is sufficient to induce  
39 biofilm formation. Using RNAseq analysis, we showed that CD1687 affects the  
40 expression of transporters and metabolic pathways and we identified several potential  
41 binding partners by pull-down assay, including transport-associated extracellular  
42 proteins. We then demonstrated that CD1687 is surface exposed in *C. difficile*, and  
43 that this localization is required for DCA-induced biofilm formation. Given this  
44 localization and the fact that *C. difficile* forms eDNA-rich biofilms, we confirmed that  
45 CD1687 binds DNA in a non-specific manner. We thus hypothesize that CD1687 is a  
46 component of the downstream response to DCA leading to biofilm formation by  
47 promoting interaction between the cells and the biofilm matrix by binding eDNA.

48

49 **Keywords:** *Clostridioides difficile*, biofilm, eDNA-binding protein

50

## 51 Introduction

52

53 Gastrointestinal infections are a major public health issue. In high-income countries, the Gram-  
54 positive spore forming anaerobe *Clostridioides difficile* is the leading cause of nosocomial  
55 diarrhea and colitis in adults receiving antibiotic treatments (1,2). Moreover, *C. difficile*  
56 infections (CDI) can be persistent, which is a major challenge in the management of CDI  
57 following anti-*C. difficile* antibiotic treatment. Recurrent CDI occur in more than 20% of patients  
58 that receive antibiotics to treat their first CDI episode and this rate increases following new  
59 episodes (3,4). The causes of recurrences have not been fully elucidated. Recurrence can be  
60 caused by either reinfection with a new strain or relapse with the same strain, suggesting that  
61 *C. difficile* can persist in the gastrointestinal tract (5). Relapses were initially correlated with *C.*  
62 *difficile* ability to sporulate during the infection and resist antibiotic treatment (6,7). However,  
63 relapses are also hypothesized to be associated with the persistence of *C. difficile* as a biofilm  
64 (8,9). Persistent and chronic infections caused by different pathogens are known to be  
65 associated with biofilm formation (10). It is estimated that at least 60% of all nosocomial and  
66 chronic bacterial infections are biofilm-associated (11). In support of this hypothesis, *C. difficile*  
67 was recently showed to integrate biofilms formed by the colonic microbiota and this biofilm  
68 acted as a reservoir for persistence and recurrence in a laboratory model of CDI (9).

69

70 Biofilms are structured communities of microorganisms associated with surfaces and encased  
71 in a self-produced extracellular matrix, which varies between bacterial species (12). *C. difficile*  
72 can form biofilms as a single species or with other bacteria on various abiotic surfaces and  
73 several *in vitro* systems (9,13–15). Moreover, *C. difficile* can integrate *in vivo* multi-species  
74 communities during a mouse infection, suggesting its ability to integrate mucosal biofilms (16).  
75 Additionally, *C. difficile* can form patchy glycan-rich biofilm-like structures in a mono-associated  
76 mouse model (17). Although *C. difficile* can integrate multispecies biofilms in the  
77 gastrointestinal tract, there is limited knowledge on the biology of *C. difficile* biofilm formation  
78 in response to the gastrointestinal environment. During an infection, pathogens encounter

79 several environmental factors including the presence of antibiotics, bile salts, osmotic pressure  
80 and varying nutrient sources and these are known to be important signals for biofilm formation  
81 during colonization (18,19). Interestingly, *C. difficile* would face different challenges during  
82 dysbiosis as it changes of the nutritional environment, bile salt metabolism, and osmotic and  
83 oxidative/nitrosative stresses, (20). Any of these factors could induce biofilm formation. For  
84 example, sub-inhibitory concentrations of antibiotics used to treat CDI enhances biofilm  
85 formation *in vitro* (21,22). Furthermore, we recently demonstrated that sub-inhibitory  
86 concentrations of the secondary bile salt deoxycholate (DCA) enhances *C. difficile* biofilm  
87 formation (15). In the DCA-induced biofilm, vegetative cells are protected from the toxicity of  
88 DCA as well as antibiotics and antimicrobial peptides (15). We showed that biofilms induced  
89 by DCA are formed due to metabolic adaptation and reprogramming that are dependent on  
90 the available nutrients and excreted metabolites. Overall, excreted pyruvate is critical for the  
91 induction of biofilm formation (23).

92  
93 In addition to environmental factors inducing biofilm formation, several cellular factors,  
94 including cell surface components and regulators, have been shown to influence biofilm  
95 formation by *C. difficile* (24). Among the genes that were up-regulated in response to DCA, a  
96 gene encoding a lipoprotein (CD1687) is essential for biofilm formation in response to DCA  
97 (15). The aim of this study was to characterize the role of CD1687 during biofilm formation by  
98 *C. difficile* in response to DCA. We demonstrated that CD1687 is exposed and active at the  
99 surface of the bacteria and that it binds DNA *in vitro*. This suggests that CD1687 acts as a  
100 protein anchoring the cells to the extracellular DNA (eDNA) present in the biofilm matrix.

101

## 102 **Methods**

103

104 **Bacterial strains and culture conditions:** Bacterial strains and plasmids used in this study  
105 are listed in Table S1 *C. difficile* strains were grown anaerobically (5% H<sub>2</sub>, 5% CO<sub>2</sub>, 90% N<sub>2</sub>)

106 in TY medium (30g/L tryptone, 20g/L yeast extract) or in BHISG medium (BHI with 0.5% (w/v)  
107 yeast extract, 0.01 mg/mL cysteine and 100mM glucose) and supplemented with ceftioxin  
108 (250µg/ml), D-cycloserine (8µg/ml) and thiamphenicol (15 µg/ml) when necessary.  
109 Additionally, 100ng/mL of anhydrotetracycline (ATC) was added to induce the  $P_{tet}$  promoter of  
110 pRPF185 vector derivatives in *C. difficile*. *E. coli* strains were grown in LB broth supplemented  
111 with chloramphenicol (15µg/mL) and ampicillin (100µg/mL).

112

113 **Biofilm assays:** Overnight cultures of *C. difficile* grown in TY medium with appropriate  
114 antibiotics were diluted to 1/100 into fresh BHISG containing the desired supplements (240µM  
115 DOC, 100ng/mL ATC or both). Depending on the assay, the diluted cultures were then  
116 aliquoted either with 1mL per well in 24-well plates (polystyrene tissue culture-treated plates,  
117 Costar, USA) or with 200µL in 96-well plates (polystyrene black tissue-culture-treated plates,  
118 Greiner Bio One, Austria). The plates were incubated at 37°C in an anaerobic environment for  
119 48h. Biofilm biomass was measured in the 24-well plates using an established method (15).  
120 For biofilm assays in 96-well-plates used for microscopy, spent medium was carefully removed  
121 by pipetting and 200µL PBS supplemented with 4% of paraformaldehyde (PFA) were added.  
122 Plates were incubated for an hour at room temperature and the media was then carefully  
123 removed by pipetting before adding PBS for 48h at 4°C. In all assays, sterile medium was used  
124 as a negative control and a blank for the assays.

125

126 **Gene deletion in *C. difficile*.** Gene deletion in *C. difficile* was performed as described in  
127 Peltier *et al.* (2020) (25). Regions upstream and downstream of the genes of interest were  
128 PCR-amplified using primer pairs described in Table S1. PCR fragments and linearized  
129 pDIA6754 (25) were mixed and assembled using Gibson Assembly (NEB, France) and  
130 transformed by heat shock in *E. coli* NEB 10β strain. The plasmid constructions were verified  
131 by sequencing and plasmids with the right sequences were transformed in *E. coli* HB101  
132 (RP4). The resulting strains were used as donors in a conjugation assay with the relevant *C.*

133 *difficile* strains. Deletion mutants were then obtained using a counter-selection as described in  
134 Peltier et al (2020) (25).

135

136 **Protein extraction from *C. difficile* and pull-down assay.** *C. difficile* strains were  
137 anaerobically grown for 48h in 20mL BHISG cultures with ATC in tubes. Cells and biofilms  
138 were harvested by centrifugation (10 min; 13000 rpm; 4°C) and washed in a cold phosphate  
139 buffer (50mM; pH=7.0; 4°C). Cells were then resuspended in 1 ml of the same phosphate  
140 buffer containing the purified catalytic domain of the endolysin CD27L (3µg/mL) and  
141 suspension was incubated 1h at 37°C to lyse the bacterial cells. The pull-down assay was then  
142 performed with Ni-NTA beads as described in supplementary data for CD1687 purification from  
143 *E. coli* expression.

144

145 **RNA isolation, qRT PCR:** Cells were grown in 24-well plates and 10 wells per plate were used  
146 to produce one replicate for one condition. For biofilm conditions, the supernatant was removed  
147 by inverting the plate and the biofilms were carefully washed twice then resuspended in 3 mL  
148 of PBS. In other conditions, the whole bacterial population was collected and cells were  
149 harvested by centrifugation (10 min, 5000 rpm, 4°C) and resuspended in 1 ml of PBS. Cell  
150 suspensions in PBS were finally centrifuged (10 min, 5000 rpm, 4°C) and the pellets were  
151 frozen at -80°C until further use. Extraction of total RNA from the bacteria and qRT PCR assay  
152 were performed as described in Saujet *et al* (2011) (26).

153

154 **Whole transcriptome sequencing and analysis:** Transcriptome analysis for each condition  
155 was performed using 4 independent RNA preparations. Libraries were constructed using the  
156 Illumina Stranded Total RNA Prep Ligation with RiboZero Plus (Illumina, USA) kit. The  
157 ribodepletion step was carried using specific probes synthesized specifically to target *C.*  
158 *difficile* ribosomal sequences. After ribodepletion, libraries were prepared according to the

159 supplier's recommendations. RNA sequencing was performed on the Illumina NextSeq 2000  
160 platform using 67 bases for a target of 10M reads per sample.

161

162 **Electromobility shift assays (EMSA).** Only freshly purified CD1687 from *E. coli* were used  
163 in these assays. CD1687 (from 0.5 $\mu$ M to 16 $\mu$ M) was incubated with DNA (pUC9 or PCR  
164 product) in 10 $\mu$ l of sodium phosphate buffer (50mM; pH=8.0) for 30 min at room temperature.  
165 Samples were loaded and migrated on TAE buffered agarose gels (1% w/v) for 90min at 100V.  
166 Controls were performed with CD1687 denatured at 100°C for 15 min before the assay. Gels  
167 were stained with ethidium bromide and pictures were taken with an Amersham ImageQuant  
168 800 (Cytiva). The pUC9 plasmid was prepared from *E. coli* stock using the Nucleospin plasmid  
169 kit (Macherey-Nagel, Germany) and the PCR amplicon used was generated using *C. difficile*  
170 630 $\Delta$ *erm* as the DNA template and primers targeting the region of *CD1438* (Table S1). gDNA  
171 was extracted from cell culture using the DNeasy Blood & Tissue Kit (QIAGEN, Netherlands).

172

173 **5'RACE experiment.** A 5'RACE was performed using the 5' RACE System for Rapid  
174 Amplification of cDNA Ends, version 2.0 kit (Invitrogen, USA). Briefly, cDNA was generated by  
175 reverse transcription from total RNA extract followed by degradation of the RNA. dC-tailing  
176 was then performed with the cDNA and the resulting dC-tailed DNA was used as the template  
177 in PCR as described in the kit instructions. The PCR products were analyzed by agarose gel  
178 electrophoresis (1% agarose in TAE buffer). To identify the transcription start sites, PCR  
179 products were inserted into the pGEM-T easy vector kit as described by the manufacturer  
180 (Promega, USA). Insert were then PCR-amplified and the resulting PCR products were  
181 sequenced.

182

183 **Epifluorescence microscopy.** For microscopy, 48h biofilms were generated in 96-well plates  
184 (black, Greiner) as described above, washed and 50 $\mu$ l of the polyclonal anti-CD1687  
185 antibodies diluted in PBS (400 ng/mL) was then added to each well and incubated overnight

186 at 4°C. The wells were carefully washed twice with PBS followed by the addition of a solution  
187 containing DAPI (1/1000 dilution) and secondary antibodies (goat anti-rabbit conjugated with  
188 Texas Red; 1/5000 dilution; Invitrogen) in PBS. The plates were incubated at room temperature  
189 for 2h. Wells were then carefully washed with PBS and 200µl of fresh PBS was added for data  
190 acquisition. Images were taken with the Nikon Eclipse Ti inverted microscope (Nikon, Japan).

191

192 **Statistical analysis.** The biofilm assays and RT-qPCR were analysed using a one-way  
193 ANOVA test followed by either a Tukey's multiple comparison test or a Dunnett's multiple  
194 comparison test.

195 **Data Availability.** RNA-Seq data generated in this study are available in the NCBI-GEO with  
196 the accession number GSE218475. The mass spectrometry proteomics data have been  
197 deposited to the ProteomeXchange Consortium via the PRIDE partner repository with the  
198 dataset identifier PXD038282.

199

## 200 **Results**

201

202 **Genes of the *CD1685-CD1689* locus form an operon but multiple transcription start site**  
203 **control their expression**

204

205 In previous transcriptomic experiments, we observed that the majority of genes in the *CD1685*  
206 - *CD1689* cluster were up-regulated in the 48h DCA-induced biofilm formed by *C. difficile* strain  
207 630Δ*erm* (15,23). However, inactivation of CD1687 but not CD1688 prevented DCA-induced  
208 biofilm formation. To verify that the *CD1685-CD1689* genes formed an operon, RT-PCR  
209 experiments were performed with RNA extracted from cells grown under biofilm inducing  
210 conditions (BHISG with 240µM DCA). We observed a unique transcript spanning *CD1685* to  
211 *CD1689* suggesting the presence of at least one polycistronic mRNA at this locus (Fig 1a). We



212 then performed qRT-PCR to confirm that the five genes were up-regulated at 48h in the  
213 presence of DCA and only small difference in the fold changes were seen (Fig S1a).  
214 When looking at our previous RNAseq experiments, we observed a mapping bias of the  
215 sequencing reads favouring CD1687, CD1688 and CD1689 (Fig S1b). Interestingly, recent  
216 analyses predicted three transcription starting sites (TSS) for the CD1685-CD1689 locus: one  
217 upstream of the *CD1685* gene (TSS1), one upstream the *CD1686* gene (TSS2) and one in the  
218 coding sequence of *CD1686* (TSS3) (27,28) (Fig 1c). To confirm the existence of multiple TSS,  
219 5'-RACE experiments were performed with total RNA extracted from cells grown for 48h in  
220 BHISG with DCA (i.e. biofilm-inducing) or without DCA (i.e. non-biofilm inducing). The initial  
221 reverse transcriptions were performed with two primers annealing either the coding sequence  
222 of *CD1686* (P1686) or the coding sequence of *CD1687* (P1687) (Fig 1bc). In the absence of  
223 DCA, only one amplicon was observed, which is associated with the TSS inside *CD1686*. This  
224 amplicon was detectable when the P1686 primer was used but not with the P1687 primer. In  
225 the presence of DCA, we observed amplicons corresponding to the three predicted TSS with  
226 either primer (P1686 or P1687) and two additional amplicons were detected with P1687. This  
227 suggest that these two additional TSS (TSSa and TSSb; Fig 1c) are active in the presence of  
228 DCA and one of these (TSSa) appears to be the most active of all TSS (Fig1b). Each amplicon  
229 was sequenced (Table S2) and the location of TSS1, TSS2 and TSS3 closely matched their  
230 predicted location. However, high variation of the sequences for TSSa and TSSb made it  
231 difficult to identify their exact location. Overall, the transcription of the *CD1685-CD1689* operon  
232 is initiated from multiple TSS in the presence of DCA, suggesting that multiple factors are  
233 integrated to regulate the expression of the CD1685-CD1689 operon to reflect the state of the  
234 bacterial population.

235

### 236 **Overexpressing CD1687 induces biofilm formation in the absence of DCA**

237

238 We previously inactivated *CD1687* using the Clostron system (15) but this approach is known  
239 to have some limitations. To confirm that only *CD1687* was required for biofilm formation,

240 deletion of *CD1686*, *CD1687* and *CD1688-CD1689* were generated (Fig S2a). As observed  
241 before, only the deletion of *CD1687* negatively affected biofilm-formation and complementation  
242 restore the phenotype (Fig S2bc). Interestingly, deletion of *CD1686* removed TSS3, TSSa and  
243 TSSb suggesting that TSS1 and/or TSS2 are sufficient for the transcription of *CD1687* in the  
244 presence of DCA resulting in biofilm formation.

245

246 Since *CD1687* is required for DCA-induced biofilm formation and previously localised in the  
247 cell wall fraction (15), we hypothesized that *CD1687* is a DCA-sensing protein. To test this  
248 hypothesis, we verified the ability of *CD1687* to directly interact with DCA using surface  
249 plasmon resonance. We showed that *CD1687* can interact with DCA (Fig S3). However, the  
250 dissociation constant is high ( $K_d$  of  $1.65 \pm 0.58$  mM), and the estimated stoichiometry of the  
251 interaction is of  $5 \pm 1$  DCA molecules for one *CD1687* protein, which implies that the interaction  
252 is not specific.

253

254 Interestingly, we observed an increase in biofilm formation in the presence and, to a certain  
255 extent, in absence of DCA when the  $\Delta 1687$  mutant was complemented with an inducible  
256 plasmid-borne *CD1687* (pDIA6920) (Fig S2C). Although the increase was not significant, it  
257 suggested that *CD1687* could induce biofilm formation in the absence of DCA. To test this  
258 hypothesis, pDIA6920 was introduced in the wild type strain and its ability to form biofilm in the  
259 absence of DCA was evaluated with and without the addition of the inducer ATC. When  
260 *CD1687* was overexpressed, a stronger biofilm was detectable at 24h and 48h (Fig 2). Taken  
261 together, our results suggest that *CD1687* expression is critical for biofilm formation which  
262 does not require DCA for its activity.

263

### 264 **CD1687 affects the expression of several transporter and metabolic priorities**

265

266 As *CD1687* is essential for DCA-induced biofilm formation and its overexpression can induce  
267 biofilm formation in the absence of DCA, we sought to identify genes controlled by *CD1687*

268 during the biofilm formation process. To do so, we performed two transcriptomic analyses: one  
269 comparing the wild type and the  $\Delta 1687$  mutant grown in presence of DCA for 24h, and the  
270 second comparing the wild-type grown in absence of DCA for 24h overexpressing CD1687 or  
271 not overexpressing CD1687.

272

273 A total of 527 genes had a significant differential expression with a fold change  $<0.5$  or  $>2$  in  
274 the wild type strain compared to the  $\Delta 1687$  mutant under biofilm inducing conditions (+DCA)  
275 (Fig 3). In the presence of DCA, CD1687 seems to mainly downregulate the cell wall  
276 reticulation (*vanY2Y3*) as well as several uncharacterized regulators (Fig S4, Table S3). There  
277 seems to be a shift in membrane transporters that may result in an increase in the importation  
278 of branched-chain amino acids, iron and a change in sugar transport (Table S3). In terms of  
279 metabolism, the cells shift from the utilization of succinate (*CD2338-CD2344*), the Wood-  
280 Ljungdahl pathway and the biosynthesis of aromatic amino acids to the fermentation of acetoin,  
281 leucine, branched chain amino acids and glycine (Fig S4, Table S3).

282

283 When CD1687 was overexpressed, 809 genes were differentially expressed, 343 genes were  
284 up regulated and 466 were down-regulated (Fig 3). As described in Fig S4, changes in gene  
285 expression indicate a shift in transporters, metabolism and regulation. Specifically, the  
286 expression of several sugar transporters is increased whereas the expression of the branched  
287 chain amino acids, methionine, alanine and glycine transporters is down-regulated (Table S3).  
288 In terms of metabolism, genes involved in acetoin utilization, Stickland fermentations involving  
289 aromatic amino acids or leucine, the Wood-Ljungdahl pathway and the pentose phosphate  
290 pathway are up-regulated as well as those involved in the biosynthesis of several amino acids  
291 such as histidine, isoleucine, valine and cysteine (Table S3). The *dltABCD* operon is up-  
292 regulated suggesting an increase of the D-alanylation of the teichoic acids (*dltABCD*).  
293 Interestingly, we noted that the gene cluster encoding the flagellum and genes associated with  
294 sporulation were up-regulated.

295

296 When we compared both transcriptomic analyses, few genes overlapped between both  
297 analyses. Only 69 genes changed in the same direction whereas 47 genes were regulated in  
298 opposite direction (Fig 3). The remaining 1220 genes were differentially expressed only under  
299 either condition (Fig 3). The genes that were regulated in both conditions include those  
300 involved in cysteine synthesis (*cysE*, *cysK*), leucine utilization in Stickland fermentation  
301 (*hadABC*), acetoin fermentation (*acoABCL*), cell wall proteins (*cwp9*, *cwp12*), some  
302 transporters (*alsT* transporting alanine or glycine, *rbsK* transporting ribose) and regulation  
303 (*sinRR*). Overall, this suggests that CD1687 induces metabolic reorganization, including those  
304 occurring in response to DCA that leads to biofilm formation (23).

305

306 However, these changes do not fully align with our previous analyses (23). We previously  
307 observed that DCA causes the up-regulation of gene involved in butanoate, lactate and acetate  
308 fermentations, a shift in Stickland fermentations from the use of aromatic amino acids to the  
309 use of branched chain amino acids and glycine, and the down-regulation of genes involved in  
310 glycolysis, glucose intake and sporulation (23). These changes were not observed when  
311 CD1687 was overexpressed suggesting that CD1687 is not involved in those processes or  
312 does not mediate the immediate response to DCA. CD1687 is probably part of the downstream  
313 response and may interact with other proteins to promote these changes.

314

### 315 **CD1687 interacts with several cell wall proteins**

316

317 Given that CD1687 is a cell wall protein (15) and does not have a transmembrane domain, we  
318 hypothesized that CD1687 induces transcriptional changes by transmitting external signals by  
319 interacting with membrane proteins. To find these potential proteins, we performed a pull-down  
320 assay using crude extracts of *C. difficile* cells overexpressing a hexahistidine tagged CD1687  
321 in BHISG without DCA, and 43 proteins were captured (Table S5). Among the identified  
322 proteins, four are predicted to be membrane proteins and include a component of sugar

323 transporter (CD2667) and a sodium symporter (CD2693). We also identified four proteins that  
324 belong to the large family of solute binding proteins associated with ABC transporters and one  
325 nucleotide phosphodiesterase (CD0689). These five proteins could be involved in signal  
326 transport and cellular response leading adaptation in different environmental conditions  
327 (29,30). Among the membrane proteins, we also found a putative lipoprotein (CD0747) and a  
328 LCP (LytR-CpsA-Psr) family protein (CD2766) involved in the cell wall polysaccharide  
329 assembly (31). We noted that only one encoding gene of protein partners (CD0037) was up-  
330 regulated in both transcriptomes (Table S5), which is typically localized in the cytoplasm. Since  
331 most of the membrane proteins identified by the pull-down experiment are cell wall proteins  
332 involved in membrane transport, it is possible that CD1687 directly affect transport of different  
333 nutrients and is consistent with the observed effect in our transcriptomes.

334

### 335 **CD1687 is exposed at the cell surface**

336

337 Since CD1687 was detected in the cell wall fraction (15), we wondered whether CD1687 is  
338 exposed at the cell surface. To verify this, we performed epifluorescence microscopy analysis  
339 of *C. difficile* 630 $\Delta$ *erm* strain and its derivatives using rabbit polyclonal antibodies raised  
340 against CD1687. When grown 48 hours in BHISG with or without DCA, no signal was observed  
341 in the  $\Delta$ 1687 mutant confirming the specificity of our antibody (Fig 4 and Fig S5). For the wild-  
342 type strain, we observed a weak signal when grown in absence of DCA, confirming that this  
343 protein is expressed at low levels under non-biofilm inducing conditions. In the presence of  
344 DCA, the signal was stronger in the presence of DCA, although the expression of CD1687 was  
345 not homogeneous in the population. In contrast, the signal for CD1687 is homogenous in the  
346 population of the complemented  $\Delta$ 1687 strain (Fig 4 and Fig S5). Since the cells were not  
347 permeabilized during the experiment, we concluded that CD1687 is exported to the cell wall  
348 and exposed at the cell surface.

349 Based on the cellular localisation of CD1687, we wondered if the addition of the anti-CD1687  
350 antibodies during growth could prevent DCA-induced biofilm formation. As shown in Fig 5a,

351 the addition of the anti-CD1687 polyclonal antibodies to cells grown under biofilm inducing  
352 conditions (BHISG + 240 $\mu$ M DCA) strongly inhibited biofilm formation in a dose-dependent  
353 manner. No inhibitory effect was observed when an unpublished non-specific antibody was  
354 used at the highest concentration of anti-CD1687 that inhibited biofilm formation (data not  
355 shown). Additionally, bacterial growth was unaffected by the antibodies, regardless of the  
356 concentration used in the biofilm assays (Fig 5b). Therefore, inhibiting extracellular function of  
357 CD1687 prevents biofilm formation, suggesting that the presence of the CD1687 at the surface  
358 of the cell wall is critical for DCA-induced biofilm formation.

359 To get some insights on the structure-function of CD1687, we used the software AlphaFold2  
360 (32) to predict the 3D protein structure of CD1687. As shown in Fig 5c, CD1687 has an alpha  
361 helix N-terminal signal peptide and two putative beta domains. To search for possible functions  
362 of the beta barrels, the putative structure of CD1687 was analysed in the EKHIDNA database  
363 through the Dali server (33), but no function was detected. Since the function of CD1687 could  
364 be assigned to one of the two beta domains, we complemented the  $\Delta 1687$  mutant by  
365 overexpressing CD1687 with either one of the two domains removed and growing these strains  
366 under biofilm inducing conditions (BHISG + 240 $\mu$ M DCA. Complementation of the mutant was  
367 not observed, indicating that *C. difficile* needs both beta domains of the CD1687 to form DCA-  
368 induced biofilms (Fig 5d).

369

### 370 **CD1687 binds to DNA in a non-specific manner**

371

372 Since we did not identify a potential function from the CD1687 structure, we sought to  
373 determine if CD1687 has a DNA-binding activity as observed for *Staphylococcus aureus*  
374 lipoproteins that promote eDNA-dependent biofilm formation (34). Since the *C. difficile* biofilm  
375 matrix is mainly composed of eDNA (15), we tested the ability of CD1687 to bind to DNA by  
376 performing an electromobility shift assay (EMSA). When the purified CD1687 protein was  
377 incubated with the *E. coli* DNA plasmid pUC9 or a PCR-generated amplicon produced from *C.*  
378 *difficile* DNA (from a sequence in the region of *CD1438*), we observed that the migration of the

379 DNA was shifted by the presence of the CD1687 and increasing CD1687 concentration  
380 correlates with more retention (Fig 6ab). However, we did not observe a shift when CD1687 is  
381 heat-inactivated or if BSA was used as control at the highest concentration of CD1687 that  
382 shift DNA fragments. Therefore, CD1687 can bind DNA and could potentially interact with  
383 eDNA when exposed at the surface.

384

## 385 **Discussion**

386

387 In this study, we confirmed that only CD1687 in the *CD1685-CD1689* cluster was required for  
388 DCA-induced biofilm formation and this required the localization of CD1687 at the cell surface.  
389 Despite this importance, there is a significant heterogeneity in response to DCA for the  
390 expression and localization of CD1687 at cell surface in the population as observed by  
391 microscopy (Fig 4 and Fig S5). This would explain the relatively low transcriptional level of the  
392 *CD1685-CD1689* gene cluster at the population level (15). Interestingly, the more CD1687 is  
393 homogeneously expressed in the cell population, the greater the biofilm formed (Fig 4, Fig  
394 S2c). To our knowledge, expression heterogeneity of critical biofilm components has not yet  
395 been reported in *C. difficile*. Phenotypic heterogeneity in biofilms is well characterized in  
396 several other bacterial species resulting in phenotypic diversification and division of labor in a  
397 clonal bacterial population (35). For example, a subpopulation of cells synthesize the  
398 exopolysaccharides matrix during biofilm formation in *B. subtilis* (36). Phenotypic  
399 heterogeneity has been described in planktonic cells of *C. difficile* and this affected the  
400 expression of the flagellum and toxins (37). In this case, heterogeneity is controlled by a  
401 specific DNA recombination event mediated by RecV (38) and the Rho factor (39). In addition,  
402 *C. difficile* colony morphology is also subjected to phenotypic heterogeneity resulting in  
403 changes in bacterial physiology and pathogenesis and this occurs through phase variation of  
404 the CmrRST signal transduction system expression (40,41).

405

406 Given that CD1687 forms an operon with a two-component regulatory system (CD1688-1689)  
407 and that CD1687 is a cell wall protein, we first hypothesized that CD1687 was involved in  
408 signal transduction leading to transcriptional modifications in response of DCA. However,  
409 CD1687 did not bind DCA, which eliminates the role of CD1687 as a DCA sensing protein.  
410 Furthermore, we compared genes regulated by CD1688 (42) and, with the exception of  
411 sporulation, found limited overlap suggesting that CD1687 may not be part of the CD1688-  
412 CD1689 signaling cascade. This is consistent with the absence of CD1689 and CD1688 in our  
413 pull-down assay. However, several solute-binding proteins and transporter-associated  
414 proteins were isolated in a pull-down assay. This and the transcriptional analysis provide  
415 evidence that CD1687 influences the metabolism of *C. difficile*. In support of this, regulators  
416 (Spo0A, CodY and SinRR') that manage metabolic priorities during growth phases, were  
417 differentially regulated when CD1687 was overexpressed (26,43,44). Furthermore, the  
418 expression of the gene encoding toxin and those involved in sporulation were also affected  
419 and these processes are known to be dependent on the metabolic state of *C. difficile*. When  
420 we compared the genes differentially regulated in the absence of CD1687 under DCA-inducing  
421 conditions to those differentially regulated when CD1687 was overexpressed in the absence  
422 of DCA, there were only 69 common genes, which included genes involved in different  
423 metabolic pathways and transport. However, these changes in metabolism-associated genes  
424 did not overlap with our previous analyses on gene expression during DCA-induced biofilm  
425 formation (23), suggesting that CD1687 is not part of the immediate response to DCA and  
426 probably plays a role in the downstream response. Taken together, our data suggest that  
427 CD1687 helps reorganize metabolic priorities in response to DCA but this hypothesis alone  
428 does not explain the role of CD1687 in the biofilm formation without DCA. Therefore, CD1687  
429 may have additional roles.

430

431 Interestingly, many proteins found at the bacterial cell surface interact with eDNA found in the  
432 biofilm matrix and this contributes to the organization and structural stability of the biofilm (45).  
433 Membrane lipoproteins have already been shown to directly interact with eDNA and participate



434 in biofilm architecture. In *S. aureus*, several membrane-attached lipoproteins interacting with  
435 the eDNA of the biofilm matrix have been identified as promoting *S. aureus* biofilm formation  
436 (34). We demonstrated that CD1687 interacts with DNA in a non-specific manner supporting  
437 the hypothesis that CD1687 acts as an eDNA binding protein during biofilm formation by  
438 creating anchor points for eDNA on the cell surface. Similar to our observation with CD1687,  
439 overexpressing eDNA-binding proteins in *S. aureus* resulted in an increased retention of  
440 surface eDNA and an enhanced biofilm biomass. However, deleting the *S. aureus* lipoproteins  
441 had minimal impact on biofilm formation but biofilm porosity increase indicating that  
442 interactions of the lipoprotein with eDNA contribute to overall biofilm structure. Unlike the  
443 lipoprotein found in *S. aureus*, a deletion or inactivation of *CD1687* abolished biofilm formation  
444 (34). CD1687 interacting with eDNA seems to be an essential part of DCA-induced biofilm  
445 formation. Other structures may also interact with eDNA. Recently, two minor subunits (PilW  
446 and PilJ) of the *C. difficile* T4P were shown to directly interact with eDNA to promote biofilm  
447 formation (46). Neither subunit have a predicted DNA-binding motif as observed with CD1687.  
448 The T4P is a structure that promotes biofilm formation in the absence (47,48) or presence of  
449 DCA (23). In the presence of DCA, PilW is upregulated but is not required for biofilm formation  
450 (15,23). Furthermore, the *pilW* gene was differently regulated in our transcriptome; up-  
451 regulated in the WT vs  $\Delta 1687$  with DCA analysis (significantly but below the threshold) and  
452 down-regulated in the overexpressed CD1687 vs WT without DCA analysis. Therefore,  
453 CD1687 and the T4P may have complementary role and the lack of eDNA-binding by one of  
454 these components may change the behavior of *C. difficile* during biofilm formation.

455

456 Despite the potential role of CD1687 as an eDNA-binding protein and in metabolism, we cannot  
457 exclude that the overexpression of CD1687 modifies the properties of the cell wall through the  
458 interactions of CD1687 with other membrane proteins and transporters (Table S5). These  
459 interactions could be detected by different sensors, which would activate a feedback loop to  
460 modify the cell wall and the composition of the cell surface proteins. For example, the *dltABCD*  
461 operon was up-regulated when CD1687 was overexpressed in the absence of DCA. The

462 DltABCD proteins are responsible for the D-alanylation of teichoic acids, which changes the  
463 electrical charges of the cell wall and surface (49). Overexpression of CD1687 also affected  
464 cell morphology; in response to DCA, cells expressing high levels of CD1687 show reduced  
465 size and shape distortion (Fig 4 and Fig S5). Overall, the overexpression of CD1687 may have  
466 downstream effects on the physiology of *C. difficile* and these changes may contribute to  
467 biofilm formation.

468

469 Finally, our hypothesis is that the mechanism for biofilm formation in the presence of DCA is  
470 different than the mechanism when DCA is absent and CD1687 is overexpressed. In the  
471 presence of DCA, we know that *C. difficile* goes through a metabolic re-organization (23) and,  
472 based on our data, CD1687 would help with metabolic priorities for long term adaptation. Once  
473 there is enough eDNA, CD1687 would interact with eDNA binding and serve as an anchor  
474 point. When CD1687 is overexpressed independently of DCA, it increases homogeneity of  
475 CD1687 surface localization in the population and serves as multiple anchoring sites for eDNA  
476 resulting in a strongly adherent biofilm. As observed in *S. aureus*, other lipoproteins may bind  
477 eDNA in *C. difficile* and several are upregulated in response to DCA (23). Unlike the  
478 lipoproteins characterized in *S. aureus*, the lipoprotein CD1687 probably has a critical function  
479 in metabolism in response to DCA and other lipoproteins do not provide functional redundancy.  
480 This highlights the importance of CD1687 in promoting biofilm formation. More research will  
481 be needed to understand the role and the contribution of these other lipoproteins to biofilm.

482

### 483 **Acknowledgements**

484 This work was funded by the Institut Pasteur, the “Integrative Biology of Emerging Infectious  
485 Diseases” (LabEX IBEID) funded in the framework of the French Government’s “Programme  
486 Investissements d’Avenir” and The ANR DifBioRel AAPCE5. EA is a doctoral fellow of  
487 Université Paris-Cité. LH is a doctoral fellow of Sorbonne Université.

488

489 **Competing Interests:** The authors declare that there are no competing interests.

490

491

492

493

494 **References**

- 495 1. Rupnik M, Wilcox MH, Gerding DN. *Clostridium difficile* infection: new developments in  
496 epidemiology and pathogenesis. *Nat Rev Microbiol*. 2009 Jul;7(7):526–36.
- 497 2. Giles J, Roberts A. Chapter Seven - *Clostridioides difficile*: Current overview and future  
498 perspectives. In: Donev R, editor. *Advances in Protein Chemistry and Structural Biology*  
499 [Internet]. Academic Press; 2022 [cited 2022 Sep 20]. p. 215–45. (Immunotherapeutics;  
500 vol. 129). Available from:  
501 <https://www.sciencedirect.com/science/article/pii/S1876162321000845>
- 502 3. Barbut F, Richard A, Hamadi K, Chomette V, Burghoffer B, Petit JC. Epidemiology of  
503 Recurrences or Reinfections of *Clostridium difficile*-Associated Diarrhea. *J Clin Microbiol*.  
504 2000 Jun;38(6):2386–8.
- 505 4. Guery B, Galperine T, Barbut F. *Clostridioides difficile* : diagnosis and treatments. *BMJ*.  
506 2019 Aug 20;4609.
- 507 5. Sachsenheimer FE, Yang I, Zimmermann O, Wrede C, Müller L v., Gunka K, et al.  
508 Genomic and phenotypic diversity of *Clostridium difficile* during long-term sequential  
509 recurrences of infection. *International Journal of Medical Microbiology*. 2018 Apr  
510 1;308(3):364–77.
- 511 6. Deakin LJ, Clare S, Fagan RP, Dawson LF, Pickard DJ, West MR, et al. The *Clostridium*  
512 *difficile* spo0A gene is a persistence and transmission factor. *Infect Immun*. 2012  
513 Aug;80(8):2704–11.
- 514 7. Castro-Córdova P, Mora-Urbe P, Reyes-Ramírez R, Cofré-Araneda G, Orozco-Aguilar J,  
515 Brito-Silva C, et al. Entry of spores into intestinal epithelial cells contributes to recurrence  
516 of *Clostridioides difficile* infection. *Nat Commun*. 2021 Feb 18;12(1):1140.
- 517 8. Tijerina-Rodríguez L, Villarreal-Treviño L, Morfín-Otero R, Camacho-Ortiz A, Garza-  
518 González E. Virulence Factors of *Clostridioides (Clostridium) difficile* Linked to Recurrent  
519 Infections. *Can J Infect Dis Med Microbiol*. 2019;2019:7127850.
- 520 9. Normington C, Moura IB, Bryant JA, Ewin DJ, Clark EV, Kettle MJ, et al. Biofilms harbour  
521 *Clostridioides difficile*, serving as a reservoir for recurrent infection. *npj Biofilms and*  
522 *Microbiomes*. 2021 Feb 5;7(1):1–10.
- 523 10. Hall-Stoodley L, Stoodley P. Evolving concepts in biofilm infections. *Cellular*  
524 *Microbiology*. 2009;11(7):1034–43.
- 525 11. Jamal M, Ahmad W, Andleeb S, Jalil F, Imran M, Nawaz MA, et al. Bacterial biofilm and  
526 associated infections. *Journal of the Chinese Medical Association*. 2018 Jan 1;81(1):7–  
527 11.

- 528 12. Vlamakis H, Chai Y, Beauregard P, Losick R, Kolter R. Sticking together: building a  
529 biofilm the *Bacillus subtilis* way. *Nat Rev Microbiol*. 2013 Mar;11(3):157–68.
- 530 13. Vuotto C, Donelli G, Buckley A, Chilton C. *Clostridium difficile* Biofilm. In: Mastrantonio P,  
531 Rupnik M, editors. *Updates on Clostridium difficile in Europe: Advances in Microbiology,*  
532 *Infectious Diseases and Public Health Volume 8* [Internet]. Cham: Springer International  
533 Publishing; 2018 [cited 2019 Oct 9]. p. 97–115. (*Advances in Experimental Medicine and*  
534 *Biology*). Available from: [https://doi.org/10.1007/978-3-319-72799-8\\_7](https://doi.org/10.1007/978-3-319-72799-8_7)
- 535 14. Poquet I, Saujet L, Canette A, Monot M, Mihajlovic J, Ghigo JM, et al. *Clostridium difficile*  
536 Biofilm: Remodeling Metabolism and Cell Surface to Build a Sparse and  
537 Heterogeneously Aggregated Architecture. *Front Microbiol*. 2018;9:2084.
- 538 15. Dubois T, Tremblay YDN, Hamiot A, Martin-Verstraete I, Deschamps J, Monot M, et al. A  
539 microbiota-generated bile salt induces biofilm formation in *Clostridium difficile*. *NPJ*  
540 *Biofilms Microbiomes*. 2019;5:14.
- 541 16. Semenyuk EG, Poroyko VA, Johnston PF, Jones SE, Knight KL, Gerding DN, et al.  
542 Analysis of Bacterial Communities during *Clostridium difficile* Infection in the Mouse.  
543 *Infect Immun*. 2015 Nov;83(11):4383–91.
- 544 17. Soavelomandroso AP, Gaudin F, Hoys S, Nicolas V, Vedantam G, Janoir C, et al. Biofilm  
545 Structures in a Mono-Associated Mouse Model of *Clostridium difficile* Infection. *Front*  
546 *Microbiol* [Internet]. 2017 Oct 25 [cited 2020 Nov 17];8. Available from:  
547 <https://www.ncbi.nlm.nih.gov/pmc/articles/PMC5661025/>
- 548 18. Ahmed NA, Petersen FC, Scheie AA. AI-2/LuxS is involved in increased biofilm formation  
549 by *Streptococcus intermedius* in the presence of antibiotics. *Antimicrob Agents*  
550 *Chemother*. 2009 Oct;53(10):4258–63.
- 551 19. Krzyściak W, Jurczak A, Kościelniak D, Bystrowska B, Skalniak A. The virulence of  
552 *Streptococcus mutans* and the ability to form biofilms. *Eur J Clin Microbiol Infect Dis*.  
553 2014 Apr;33(4):499–515.
- 554 20. Aguirre AM, Sorg JA. Gut associated metabolites and their roles in *Clostridioides difficile*  
555 pathogenesis. *Gut Microbes*. 2022 Dec;14(1):2094672.
- 556 21. Ęapa T, Unnikrishnan M. Biofilm formation by *Clostridium difficile*. *Gut Microbes*. 2013  
557 Sep 28;4(5):397–402.
- 558 22. Vuotto C, Moura I, Barbanti F, Donelli G, Spigaglia P. Subinhibitory concentrations of  
559 metronidazole increase biofilm formation in *Clostridium difficile* strains. *Pathog Dis*. 2016  
560 Mar;74(2).
- 561 23. Tremblay YDN, Durand BAR, Hamiot A, Martin-Verstraete I, Oberkampf M, Monot M, et  
562 al. Metabolic adaption to extracellular pyruvate triggers biofilm formation in *Clostridioides*  
563 *difficile*. *ISME J*. 2021 Jun 21;
- 564 24. Meza-Torres J, Auria E, Dupuy B, Tremblay YDN. Wolf in Sheep's Clothing:  
565 *Clostridioides difficile* Biofilm as a Reservoir for Recurrent Infections. *Microorganisms*.  
566 2021 Sep 10;9(9):1922.
- 567 25. Peltier J, Hamiot A, Garneau JR, Boudry P, Maikova A, Hajnsdorf E, et al. Type I toxin-  
568 antitoxin systems contribute to the maintenance of mobile genetic elements in  
569 *Clostridioides difficile*. *Communications Biology*. 2020 Nov 27;3(1):1–13.

- 570 26. Saujet L, Monot M, Dupuy B, Soutourina O, Martin-Verstraete I. The key sigma factor of  
571 transition phase, SigH, controls sporulation, metabolism, and virulence factor expression  
572 in *Clostridium difficile*. J Bacteriol. 2011 Jul;193(13):3186–96.
- 573 27. Soutourina O, Dubois T, Monot M, Shelyakin PV, Saujet L, Boudry P, et al. Genome-  
574 Wide Transcription Start Site Mapping and Promoter Assignments to a Sigma Factor in  
575 the Human Enteropathogen *Clostridioides difficile*. Front Microbiol. 2020;11:1939.
- 576 28. Fuchs M, Lamm-Schmidt V, Sulzer J, Ponath F, Jenniches L, Kirk JA, et al. An RNA-  
577 centric global view of *Clostridioides difficile* reveals broad activity of Hfq in a clinically  
578 important gram-positive bacterium. PNAS [Internet]. 2021 Jun 22 [cited 2021 Oct  
579 11];118(25). Available from: <https://www.pnas.org/content/118/25/e2103579118>
- 580 29. Hosie AHF, Allaway D, Jones MA, Walshaw DL, Johnston AWB, Poole PS. Solute-  
581 binding protein-dependent ABC transporters are responsible for solute efflux in addition  
582 to solute uptake. Molecular Microbiology. 2001;40(6):1449–59.
- 583 30. Matilla MA, Ortega Á, Krell T. The role of solute binding proteins in signal transduction.  
584 Comput Struct Biotechnol J. 2021;19:1786–805.
- 585 31. Stefanović C, Hager FF, Schäffer C. LytR-CpsA-Psr Glycopolymer Transferases:  
586 Essential Bricks in Gram-Positive Bacterial Cell Wall Assembly. Int J Mol Sci. 2021 Jan  
587 18;22(2):E908.
- 588 32. Jumper J, Evans R, Pritzel A, Green T, Figurnov M, Ronneberger O, et al. Highly  
589 accurate protein structure prediction with AlphaFold. Nature. 2021 Aug;596(7873):583–9.
- 590 33. Holm L. Dali server: structural unification of protein families. Nucleic Acids Research.  
591 2022 Jul 5;50(W1):W210–5.
- 592 34. Kavanaugh JS, Flack CE, Lister J, Ricker EB, Ibberson CB, Jenul C, et al. Identification  
593 of Extracellular DNA-Binding Proteins in the Biofilm Matrix. mBio. 2019;10(3):e01137-19.
- 594 35. Stewart WD, Haystead A, Pearson HW. Nitrogenase activity in heterocysts of blue-green  
595 algae. Nature. 1969 Oct 18;224(5216):226–8.
- 596 36. Vlamakis H, Aguilar C, Losick R, Kolter R. Control of cell fate by the formation of an  
597 architecturally complex bacterial community. Genes Dev. 2008 Apr 1;22(7):945–53.
- 598 37. Anjuwon-Foster BR, Maldonado-Vazquez N, Tamayo R. Characterization of Flagellum  
599 and Toxin Phase Variation in *Clostridioides difficile* Ribotype 012 Isolates. J Bacteriol.  
600 2018 Jul 15;200(14):e00056-18.
- 601 38. Anjuwon-Foster BR, Tamayo R. A genetic switch controls the production of flagella and  
602 toxins in *Clostridium difficile*. PLoS Genet. 2017 Mar;13(3):e1006701.
- 603 39. Trzilova D, Anjuwon-Foster BR, Torres Rivera D, Tamayo R. Rho factor mediates  
604 flagellum and toxin phase variation and impacts virulence in *Clostridioides difficile*. PLoS  
605 Pathog. 2020 Aug;16(8):e1008708.
- 606 40. Garrett EM, Sekulovic O, Wetzel D, Jones JB, Edwards AN, Vargas-Cuebas G, et al.  
607 Phase variation of a signal transduction system controls *Clostridioides difficile* colony  
608 morphology, motility, and virulence. PLoS Biol. 2019 Oct;17(10):e3000379.

- 609 41. Garrett EM, Mehra A, Sekulovic O, Tamayo R. Multiple Regulatory Mechanisms Control  
610 the Production of CmrRST, an Atypical Signal Transduction System in *Clostridioides*  
611 *difficile*. mBio. 2022 Feb 15;e0296921.
- 612 42. Kempfer ML, Morris SC, Shadid TM, Menon SK, Ballard JD, West AH. Response  
613 Regulator CD1688 Is a Negative Modulator of Sporulation in *Clostridioides difficile*. J  
614 Bacteriol. 204(8):e00130-22.
- 615 43. Purcell EB, McKee RW, Courson DS, Garrett EM, McBride SM, Cheney RE, et al. A  
616 Nutrient-Regulated Cyclic Diguanylate Phosphodiesterase Controls *Clostridium difficile*  
617 Biofilm and Toxin Production during Stationary Phase. Infect Immun. 2017;85(9).
- 618 44. Girinathan BP, Ou J, Dupuy B, Govind R. Pleiotropic roles of *Clostridium difficile* sin  
619 locus. PLoS Pathog [Internet]. 2018 Mar 12 [cited 2021 Mar 3];14(3). Available from:  
620 <https://www.ncbi.nlm.nih.gov/pmc/articles/PMC5864091/>
- 621 45. Campoccia D, Montanaro L, Arciola CR. Extracellular DNA (eDNA). A Major Ubiquitous  
622 Element of the Bacterial Biofilm Architecture. Int J Mol Sci. 2021 Aug 23;22(16):9100.
- 623 46. Ronish LA, Sidner B, Yu Y, Piepenbrink KH. Recognition of extracellular DNA by type IV  
624 pili promotes biofilm formation by *Clostridioides difficile*. Journal of Biological Chemistry.  
625 2022 Sep 3;102449.
- 626 47. Maldarelli GA, Piepenbrink KH, Scott AJ, Freiberg JA, Song Y, Achermann Y, et al. Type  
627 IV pili promote early biofilm formation by *Clostridium difficile*. Pathog Dis. 2016;74(6).
- 628 48. Allen R, Rittmann BE, Curtiss R. Axenic Biofilm Formation and Aggregation by  
629 *Synechocystis* sp. Strain PCC 6803 Are Induced by Changes in Nutrient Concentration  
630 and Require Cell Surface Structures. Appl Environ Microbiol. 2019 Apr 1;85(7):e02192-  
631 18.
- 632 49. Wood BM, Santa Maria JP, Matano LM, Vickery CR, Walker S. A partial reconstitution  
633 implicates DltD in catalyzing lipoteichoic acid d-alanylation. J Biol Chem. 2018 Nov  
634 16;293(46):17985–96.
- 635
- 636
- 637
- 638

639 **Figures**

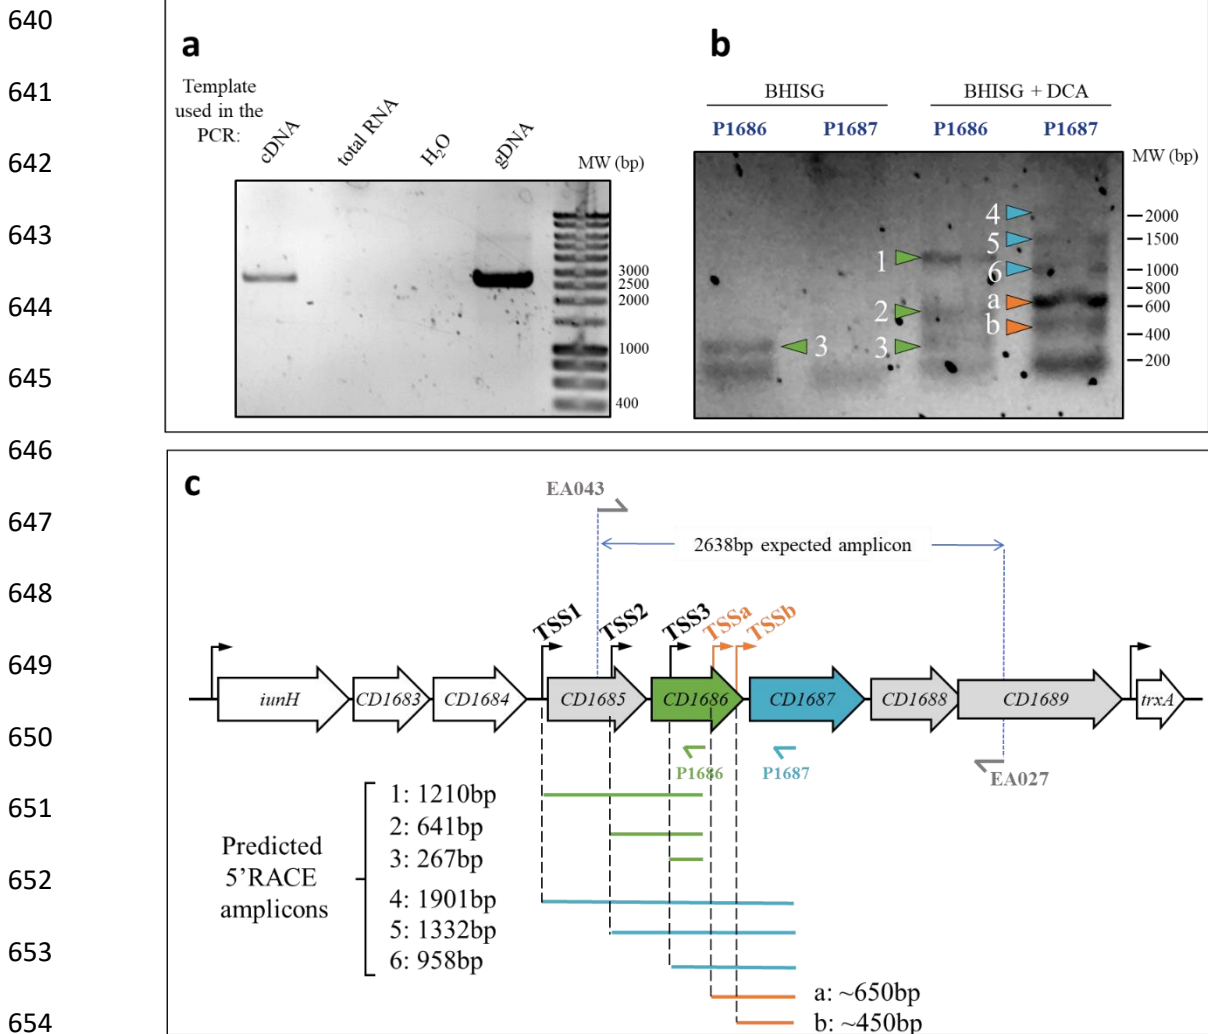

655 **Figure 1: The *CD1685-CD1689* cluster in *C. difficile* strain 630 $\Delta$ *erm* forms an operon with multiple**

656 **transcription start sites. a.** RT-PCR performed with primers EA043 and EA027 (Table S1) from various

657 nucleic acid templates. cDNA was obtained using the EA027 primer with total RNA extracted from 48h

658 biofilms grown in BHISG supplemented with DCA (240 $\mu$ M). **b.** 5'RACE results from amplification of the

659 poly-guanylated cDNA obtained respectively with the EA021 and EA018 primers (Table S1), then the

660 P1686 or P1687 primers along with the universal amplification primer (AAP) from the 5'RACE kit. The

661 RNA was extracted from 48h cell cultures grown under biofilm inducing conditions (BHISG + 240 $\mu$ M

662 DCA) or non-biofilm-inducing conditions (BHISG). **c.** Organisation of the *CD1685-CD1689* cluster, the

663 location of the primers used for RT-PCR and the amplicons from the 5'RACE results using the P1686

664 or P1687 primers (amplicon sizes were predicted from the TSS identified by Soutourina *et al.* (2020)

665 and Fuchs *et al.* (2021). TSS: Transcriptional Start Site; cDNA: complementary DNA; gDNA: genomic

666 DNA.

667

668

669

670

671

672

673

674

675

676

677

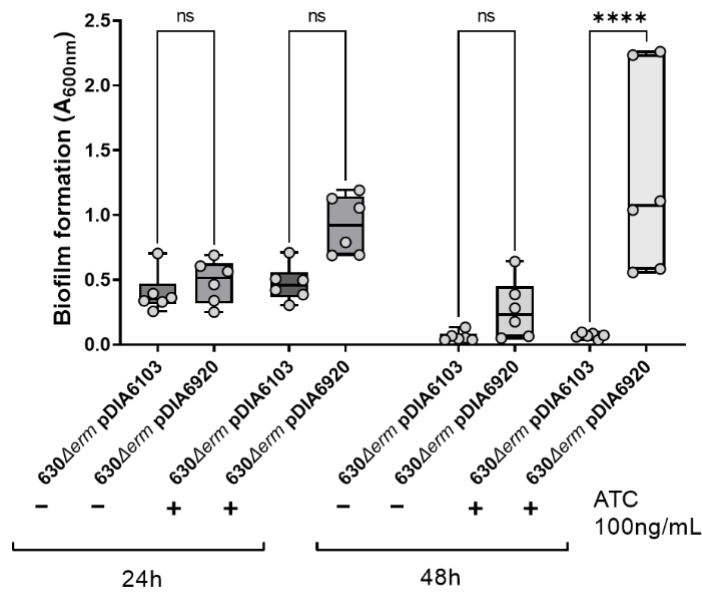

678 **Figure 2: Overexpression of CD1687 induces biofilm formation in the absence of DCA.** Biofilms

679 formation was assayed 24h or 48h after inoculation in BHISG +/- ATC (100ng/mL) with the wild type

680 strain (630Δerm) containing either a control empty vector (pDIA6103) or the vector allowing the

681 expression of CD1687 under the inducible P<sub>tet</sub> promoter (pDIA6920). Each data point represents an

682 independent biological replicate composed of 2 to 4 technical replicates.

683 Asterisks indicate statistical significance with a one-way ANOVA test followed by a Tukey's multiple

684 comparison test (ns: not significant; \*\*\*\*: p < 0.0001).

685



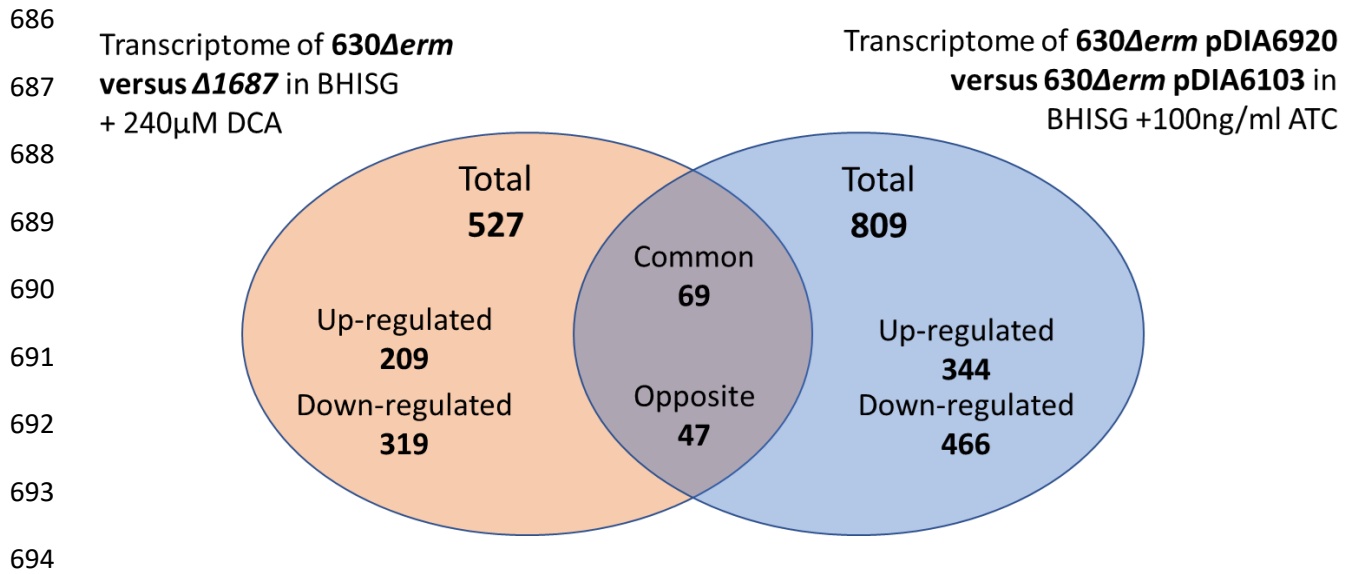

695 **Figure 3: Differences in gene expression in the two transcriptomics experiments.** Venn diagram  
696 of the genes differentially regulated in the two transcriptomics experiments performed in this study  
697 (Table S4).

698

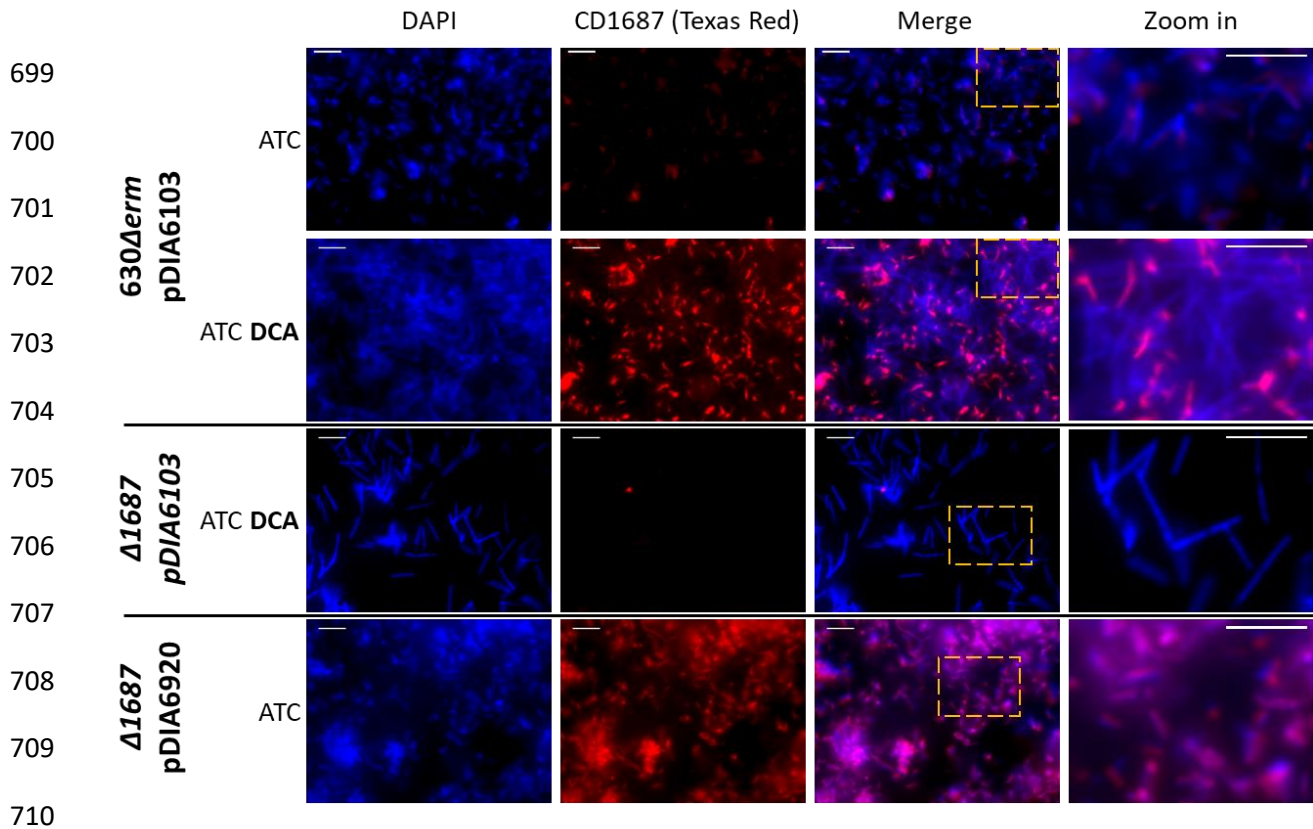

711

712

713 **Figure 4: CD1687 localizes at the cell surface of *C. difficile* and displays heterogenous**

714 **distribution within the biofilm.** *In situ* epifluorescence microscopy analysis was performed on 48h

715 biofilms grown in BHISG + ATC (100ng/mL) either in the presence or absence of DCA (240μM) as

716 indicated. The strains tested were the wild type strain (630Δerm) carrying the control vector pDIA6103

717 and with the Δ1687 strain carrying the plasmid with an inducible CD1687 (pDIA6920) or the control

718 plasmid (pDIA6103). DNA is stained with DAPI (blue) and CD1687 is labelled with specific anti-CD1687

719 rabbit antibodies detected with a TexasRed-conjugated goat anti-rabbit antibody (red). Pictures are

720 representative of three biological replicates and were taken with a Nikon Eclipse Ti inverted microscope

721 (Nikon, Japan). Scale bar: 10μm.

722

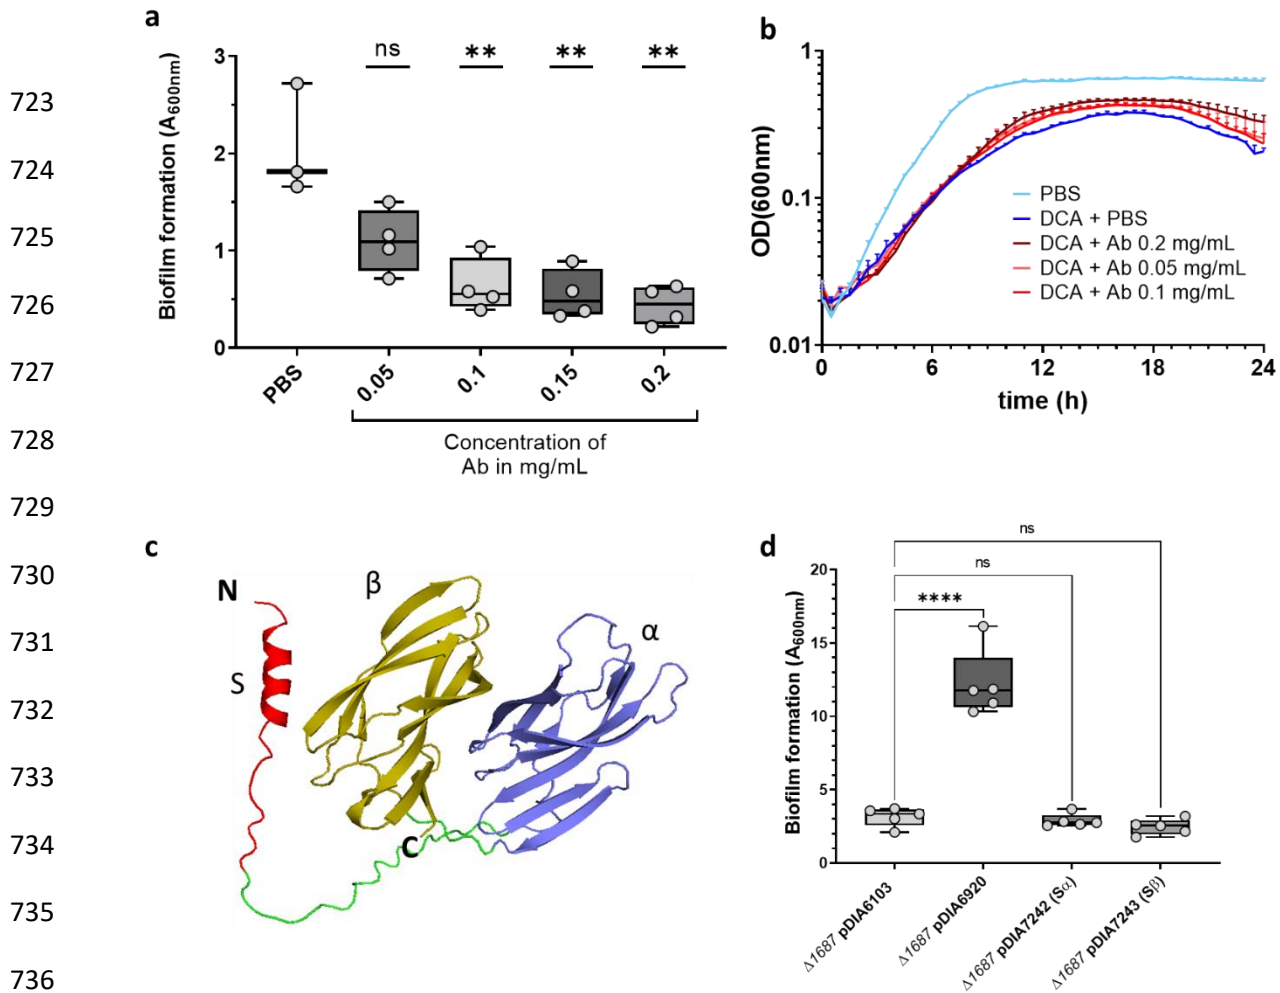

**Figure 5: DCA-induced biofilm formation is inhibited in the presence of anti-CD1687 antibodies.**

**a.** Biofilm formation of the 630Δ*erm* strain was assayed 48h in BHISG with DCA (240μM) cultures in presence of different concentration of anti-CD1687 rabbit antibodies (0.05mg/mL to 0.2mg/mL). **b.** Growth kinetics (OD<sub>600nm</sub>) of the WT (630Δ*erm*) in BHISG medium with PBS or DCA supplemented with different concentrations of anti-CD1687 rabbit antibodies (0.05mg/mL to 0.2mg/mL). Ab: antibody; nsAb: non-specific antibody. **c.** The alphaFold2 predicted structure of CD1687 show a N-terminal signal peptide S (red) connected to the α beta domain (purple) by a linker peptide (green), with another similar β beta domain (yellow) in the C-terminal region. **d.** 48h biofilms form by various Δ1687 strain complemented with an empty vector (pDIA6103) or plasmids overexpressing the full length CD1687 (pDIA6920) or truncated CD1687 lacking either one of the two domains removed (pDIA7242 and pDIA7243, Table S1) grown in BHISG with ATC (100ng/mL) and DCA (240μM). Each data point represents an independent biological replicate composed of 2 to 4 technical replicates. Asterisks indicate statistical significance with a one-way ANOVA test followed by Dunnett's multiple comparison test (a) (ns: not significant; \*\*: p<0.01) or a Tukey's multiple comparison test (d) (ns: not significant; \*\*\*\*: p<0.001).

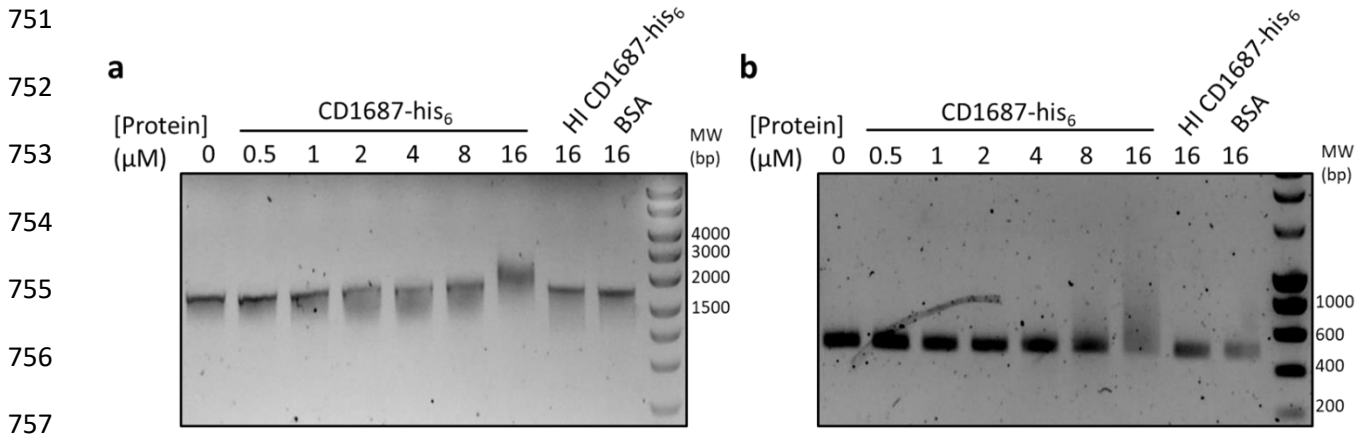

758 **Figure 6: CD1687 binds DNA and shifts DNA migration.** Electrophoretic Mobility shift assay (EMSA)  
759 was performed with **a.** *E. coli* plasmid pUC9 or **b.** *C. difficile* DNA (450bp PCR-amplicon) mixed with  
760 various concentrations of CD1687 (up to 16μM), with 16μM of heat inactivated (HI) CD1687 or BSA  
761 used as controls.
